# Supplementary material
Source: PubMed Central journal article supplement (PMC3266378)
Supplement: NIHMS342698-supplement-01.pdf [file NIHMS342698-supplement-01.pdf]

## Synthesis of Sansalvamide A Peptidomimetics: Triazole, Oxazole, Thiazole, and Pseudoproline containing compounds

Melinda R. Davis,<sup>†</sup> Hendra Wahyudi,<sup>†</sup> Erinprit K. Singh,<sup>†</sup> Leslie D. Alexander,<sup>†</sup> Lidia A. Nazarova,<sup>†</sup> Joseph B. Kunicki,<sup>†</sup> Kelly A. Fairweather,<sup>‡</sup> Andrew Giltrap,<sup>‡</sup> Katrina A. Jolliffe,<sup>‡</sup> and Shelli R. McAlpine<sup>δ \*</sup>

<sup>δ</sup> School of Chemistry, University of New South Wales, Sydney, NSW 2052 Australia

<sup>†</sup> Department of Chemistry and Biochemistry, 5500 Campanile Drive, San Diego State University, San Diego, CA 92182-1030.

<sup>‡</sup> School of Chemistry, University of Sydney, Sydney, NSW 2006 Australia

[s.mcalpine@unsw.edu.au](mailto:s.mcalpine@unsw.edu.au)

### Contents

|                                                                              |           |
|------------------------------------------------------------------------------|-----------|
| <b>Title Page</b> .....                                                      | <b>S1</b> |
| <b>Table of compounds with text describing structural variations</b> .....   | <b>6</b>  |
| <b>Table of cytotoxicity of additional compounds</b> .....                   | <b>7</b>  |
| <b>Molecular models of all compounds in stereo</b> .....                     | <b>8</b>  |
| <b>Compound 1: A-Tri-III</b> .....                                           | <b>10</b> |
| NMR Tripeptide MeO-Phe-Leu-Val-N <sub>3</sub> (22) .....                     | 10        |
| NMR Dipeptide Alkyne-Leu-Leu-NHBoc .....                                     | 11        |
| NMR Pentapeptide Alkyne-Leu-Leu-Phe-Leu-Val-N <sub>3</sub> (23).....         | 12        |
| LCMS Pentapeptide Alkyne-Leu-Leu-Phe-Leu-Val-N <sub>3</sub> .....            | 13        |
| NMR Macrocycle Phe-Leu-Val-Triazole-Leu-Leu (1).....                         | 14        |
| LCMS Macrocycle Phe-Leu-Val-Triazole-Leu-Leu (1) .....                       | 15        |
| HPLC Macrocycle Phe-Leu-Val-Triazole-Leu-Leu (1).....                        | 16        |
| HRMS Macrocycle Phe-Leu-Val-Triazole-Leu-Leu (1).....                        | 17        |
| <b>Compound 2: B-Tri-III</b> .....                                           | <b>18</b> |
| NMR Dipeptide Alkyne-Leu-Leu-N(Me)Boc .....                                  | 18        |
| NMR Tripeptide Alkyne-Leu-Leu-N(Me)-Phe-NHBoc .....                          | 19        |
| NMR Tetrapeptide Alkyne-Leu-Leu-N(Me)-Phe-Leu-NHBoc .....                    | 20        |
| NMR Pentapeptide Alkyne-Leu-Leu-N(Me)-Phe-Leu-Val-N <sub>3</sub> (33) .....  | 21        |
| LCMS Pentapeptide Alkyne-Leu-Leu-N(Me)-Phe-Leu-Val-N <sub>3</sub> (33) ..... | 22        |

## Supplementary Material

Davis et al.

|                                                                          |           |
|--------------------------------------------------------------------------|-----------|
| NMR Macrocycle Phe-Leu-Val-Triazole-Leu-Leu-N(Me) (2).....               | 23        |
| LCMS Macrocycle Phe-Leu-Val-Triazole-Leu-Leu-N(Me) (2).....              | 24        |
| HPLC Macrocycle Phe-Leu-Val-Triazole-Leu-Leu-N(Me) (2).....              | 25        |
| HRMS Macrocycle Phe-Leu-Val-Triazole-Leu-Leu-N(Me) (2) .....             | 26        |
| <b>Compound 3: A-Ox-III .....</b>                                        | <b>27</b> |
| NMR Dipeptide MeO-Ser(Bzl)-Leu-NHBoc.....                                | 27        |
| NMR Pentapeptide MeO-Oxazole-Leu-Leu-Phe-Leu-NHBoc (43) .....            | 28        |
| LCMS Linear pentapeptide MeO-Oxazole-Leu-Leu-Phe-Leu-NHBoc (43) .....    | 29        |
| NMR Macrocycle Phe-Leu-Oxazole-Leu-Leu (3).....                          | 30        |
| LCMS Macrocycle Phe-Leu-Oxazole-Leu-Leu (3).....                         | 31        |
| HPLC Macrocycle Phe-Leu-Oxazole-Leu-Leu (3).....                         | 32        |
| HRMS Macrocycle Phe-Leu-Oxazole-Leu-Leu (3).....                         | 33        |
| <b>Compound 4: B-Ox-III .....</b>                                        | <b>34</b> |
| NMR Dipeptide MeO-Leu-N(Me)-Phe-NHBoc .....                              | 34        |
| NMR Tripeptide MeO-Leu-N(Me)-Phe-Leu-NHBoc.....                          | 35        |
| NMR Dipeptide MeO-Ser(Bzl)-Leu-NHBoc.....                                | 36        |
| NMR Dipeptide MeO-Oxazole-Leu-NHBoc .....                                | 37        |
| NMR Pentapeptide MeO-Oxazole-Leu-Leu-N(Me)-Phe-Leu-NHBoc.....            | 38        |
| LCMS Pentapeptide MeO-Oxazole-Leu-Leu-N(Me)-Phe-Leu-NHBoc .....          | 39        |
| NMR Macrocycle Phe-Leu-Oxazole-Leu-Leu-N(Me) (4).....                    | 40        |
| LCMS Macrocycle Phe-Leu-Oxazole-Leu-Leu-N(Me) (4).....                   | 41        |
| HPLC Macrocycle Phe-Leu-Oxazole-Leu-Leu-N(Me) (4).....                   | 42        |
| HRMS Macrocycle Phe-Leu-Oxazole-Leu-Leu-N(Me) (4).....                   | 43        |
| <b>Compound 5: C-Ox-III .....</b>                                        | <b>44</b> |
| NMR Dipeptide MeO-Lys(Cbz)-Phe-NHBoc .....                               | 44        |
| NMR Tripeptide MeO-Lys(Cbz)-Phe-D-Phe-N(Me)Boc .....                     | 45        |
| NMR Dipeptide MeO-Ser(Bzl)-Leu-NHBoc.....                                | 46        |
| NMR Dipeptide MeO-Oxazole-Leu-NHBoc .....                                | 47        |
| NMR Pentapeptide MeO-Oxazole-Leu-Lys(Cbz)-Phe-D-Phe-N(Me)Boc .....       | 48        |
| HPLC/LCMS Pentapeptide MeO-Oxazole-Leu-Lys(Cbz)-Phe-D-Phe-N(Me)Boc ..... | 49        |
| NMR Macrocycle Phe-D-Phe-N(Me)-Oxazole-Leu-Lys(Cbz) (5) .....            | 50        |
| HPLC+LCMS Macrocycle Phe-D-Phe-N(Me)-Oxazole-Leu-Lys(Cbz) (5).....       | 51        |

**Supplementary Material**

**Davis et al.**

|                                                                                                      |           |
|------------------------------------------------------------------------------------------------------|-----------|
| HRMS Macrocycle Phe-D-Phe-N(Me)-Oxazole-Leu-Lys(Cbz) (5).....                                        | 52        |
| <b>Compound 6: D-Ox-III</b> .....                                                                    | <b>53</b> |
| NMR Dipeptide MeO-Ser(Bzl)-D-Leu-NHBoc.....                                                          | 53        |
| NMR Dipeptide MeO-Oxazole-D-Leu-NHBoc.....                                                           | 54        |
| LCMS Tripeptide HO-D-Phe-Phe-(2R,3R)/(2S,3S)- $\beta$ -OH-Leu-NHBoc.....                             | 55        |
| NMR Pentapeptide MeO-Oxazole-D-Leu-D-Phe-(2R,3R)/(2S,3S)- $\beta$ -OH-Phe-Leu-NHBoc .....            | 56        |
| LCMS Pentapeptide MeO-Oxazole-D-Leu-D-Phe-(2R,3R)/(2S,3S)- $\beta$ -OH-Phe-Leu-NHBoc .....           | 57        |
| LCMS Macrocycle (2R,3R)- $\beta$ -hydroxy-Phe-Leu-Oxazole-D-Leu-D-Phe.....                           | 58        |
| NMR Macrocycle (2R,3R)- $\beta$ -benzoxy-Phe-Leu-Oxazole-D-Leu-D-Phe (6) .....                       | 59        |
| LCMS Macrocycle (2R,3R)- $\beta$ -benzoxy-Phe-Leu-Oxazole-D-Leu-D-Phe (6).....                       | 60        |
| HPLC Macrocycle (2R,3R)- $\beta$ -benzoxy-Phe-Leu-Oxazole-D-Leu-D-Phe (6) .....                      | 61        |
| HRMS Macrocycle (2R,3R)- $\beta$ -benzoxy-Phe-Leu-Oxazole-D-Leu-D-Phe (6) .....                      | 62        |
| <b>Compound 7: D-Ox-II</b> .....                                                                     | <b>63</b> |
| NMR Dipeptide MeO-Ser(Bzl)-Val-N(Me)Boc .....                                                        | 63        |
| NMR Dipeptide MeO-Oxazole-Val-N(Me)Boc .....                                                         | 64        |
| LCMS Tripeptide HO-D-Leu-D-Phe- $\beta$ -OH-(2R,3R)/(2S,3S)-NHBoc.....                               | 65        |
| NMR Pentapeptide MeO-Oxazole-Val-N(Me)-D-Leu-D-Phe-(2R,3R)/(2S,3S)- $\beta$ -OH-Phe-NHBoc ....       | 66        |
| LCMS Pentapeptide MeO-oxazole-Val-N(Me)-D-Leu-D-Phe-(2R,3R)/(2S,3S)- $\beta$ -OH-Phe-NHBoc....       | 67        |
| LCMS Macrocycle (2R,3R)- $\beta$ -OH-Phe-Oxazole-Val-N(Me)-D-Leu-D-Phe .....                         | 68        |
| NMR Macrocycle (2R,3R)- $\beta$ -benzoxy-Phe-oxazole-Val-N(Me)-D-Leu-D-Phe (7).....                  | 69        |
| LCMS Macrocycle (2R,3R)- $\beta$ -benzoxy-Phe-oxazole-Val-N(Me)-D-Leu-D-Phe (7).....                 | 70        |
| HPLC Macrocycle (2R,3R)- $\beta$ -benzoxy-Phe-oxazole-Val-N(Me)-D-Leu-D-Phe (7).....                 | 71        |
| HRMS Macrocycle (2R,3R)- $\beta$ -benzoxy-Phe-oxazole-Val-N(Me)-D-Leu-D-Phe (7) .....                | 72        |
| <b>Compound 8: D-Ox-I</b> .....                                                                      | <b>73</b> |
| LCMS Pentapeptide HO- Leu-Val-N(Me)-D-Leu-D-Phe- $\beta$ -OH(2R,3R)(2S,3S)-Phe-NH <sub>2</sub> ..... | 73        |
| LCMS Macrocycle $\beta$ -OH(2R,3R)-Phe-Leu-Val-N(Me)-D-Leu-D-Phe .....                               | 74        |
| NMR Macrocycle $\beta$ -OH(2R,3R)-Phe-Leu-Val-N(Me)-D-Leu-D-Phe (8).....                             | 75        |
| NMR Macrocycle Phe-Oxazole-Leu-Val-N(Me)-D-Leu-D-Phe (8).....                                        | 76        |
| LCMS Macrocycle Phe-Oxazole-Leu-Val-N(Me)-D-Leu-D-Phe (8).....                                       | 77        |
| HRMS Macrocycle Phe-Oxazole-Leu-Val-N(Me)-D-Leu-D-Phe (8) .....                                      | 78        |
| <b>Compound 9: A-Th-III</b> .....                                                                    | <b>79</b> |
| NMR Dipeptide MeO-Phe-Leu-NHBoc .....                                                                | 79        |

**Supplementary Material**

**Davis et al.**

|                                                                                               |            |
|-----------------------------------------------------------------------------------------------|------------|
| NMR Tripeptide MeO-Phe-Leu-Ketone-Br (48) .....                                               | 80         |
| NMR Dipeptide Thioamide-Leu-Leu-NHBoc (52) .....                                              | 81         |
| NMR Pentapeptide MeO-Phe-Leu-Thiazole-Leu-Leu-NHBoc (53).....                                 | 82         |
| LCMS Pentapeptide MeO-Phe-Leu-Thiazole-Leu-Leu-NHBoc (53).....                                | 83         |
| NMR Macrocycle Phe-Leu-Thiazole-Leu-Leu (9) .....                                             | 84         |
| LCMS Macrocycle Phe-Leu-Thiazole-Leu-Leu (9) .....                                            | 85         |
| HPLC Macrocycle Phe-Leu-Thiazole-Leu-Leu (9) .....                                            | 86         |
| HRMS Macrocycle Phe-Leu-Thiazole-Leu-Leu (9).....                                             | 87         |
| <b>Compound 10: B-Th-III.....</b>                                                             | <b>88</b>  |
| NMR Dipeptide MeO-Leu-N(Me)-Phe-NHBoc .....                                                   | 88         |
| NMR Tripeptide MeO-Leu-N(Me)-Phe-Leu-NHBoc.....                                               | 89         |
| NMR Dipeptide EtO-Thiazole-Leu-NHBoc (57) .....                                               | 90         |
| NMR Pentapeptide EtO-Thiazole-Leu-Leu-N(Me)-Phe-Leu-NHBoc (63) .....                          | 91         |
| LCMS Pentapeptide EtO-Thiazole-Leu-Leu-N(Me)-Phe-Leu-NHBoc (63).....                          | 92         |
| NMR Macrocycle Phe-Leu-Thiazole-Leu-Leu-N(Me) (10) .....                                      | 93         |
| LCMS Macrocycle Phe-Leu-Thiazole-Leu-Leu-N(Me) (10) .....                                     | 94         |
| HPLC Macrocycle Phe-Leu-Thiazole-Leu-Leu-N(Me) (10) .....                                     | 95         |
| HRMS Macrocycle Phe-Leu-Thiazole-Leu-Leu-N(Me) (10).....                                      | 96         |
| <b>Compound 11: C-Th-III .....</b>                                                            | <b>97</b>  |
| NMR Dipeptide MeO-Lys(Cbz)-Phe-NHBoc .....                                                    | 97         |
| NMR Tripeptide MeO-Lys(Cbz)-Phe-D-Phe-N(Me)Boc .....                                          | 98         |
| NMR Dipeptide EtO-Thiazole-Leu-NHBoc .....                                                    | 99         |
| NMR Pentapeptide EtO-Thiazole-Leu-Lys(Cbz)-Phe-D-Phe-N(Me)Boc .....                           | 100        |
| HPLC+LCMS Pentapeptide EtO-Thiazole-Leu-Lys(Cbz)-Phe-D-Phe-N(Me)Boc .....                     | 101        |
| NMR Macrocycle Phe-D-Phe-N(Me)-Thiazole-Leu-Lys(Cbz) (11) .....                               | 102        |
| HPLC+LCMS Macrocycle Phe-D-Phe-N(Me)- Thiazole-Leu-Lys(Cbz) (11) .....                        | 103        |
| HRMS Macrocycle Phe-D-Phe-N(Me)- Thiazole-Leu-Lys(Cbz) (11) .....                             | 104        |
| <b>Compound 12: A-PP-II.....</b>                                                              | <b>105</b> |
| LCMS Deprotected Pentapeptide HO-Thr( $\Psi$ Me,Me-Pro)-Val-Leu-Leu-Phe-NH <sub>2</sub> ..... | 105        |
| NMR Macrocycle Phe-Thr( $\Psi$ Me,Me-Pro)-Val-Leu-Leu (12).....                               | 106        |
| LCMS Macrocycle Phe-Thr( $\Psi$ Me,Me-Pro)-Val-Leu-Leu.....                                   | 107        |
| HPLC Macrocycle Phe-Thr( $\Psi$ Me,Me-Pro)-Val-Leu-Leu (12).....                              | 108        |

**Supplementary Material**

**Davis et al.**

|                                                                                               |            |
|-----------------------------------------------------------------------------------------------|------------|
| HRMS Macrocycle Phe-Thr( $\Psi$ Me,Me-Pro)-Val-Leu-Leu .....                                  | 109        |
| <b>Compound 13: A-PP-III .....</b>                                                            | <b>110</b> |
| LCMS Deprotected Pentapeptide HO-Thr( $\Psi$ Me,Me-Pro)-Leu-Leu-Phe-Leu-NH <sub>2</sub> ..... | 110        |
| NMR Macrocycle Phe-Leu-Thr( $\Psi$ Me,Me-Pro)-Leu-Leu (13) .....                              | 111        |
| LCMS Macrocycle Phe-Leu-Thr( $\Psi$ Me,Me-Pro)-Leu-Leu (13).....                              | 112        |
| HPLC Macrocycle Phe-Leu-Thr( $\Psi$ Me,Me-Pro)-Leu-Leu (13) .....                             | 113        |
| HRMS Macrocycle Phe-Leu-Thr( $\Psi$ Me,Me-Pro)-Leu-Leu (13) .....                             | 114        |

**Supplementary Material**

**Davis et al.**

**Table of compounds with text describing structural variations**

| <b>Comp #</b> |           | <b>aa<sub>1</sub></b>         | <b>aa<sub>2</sub></b>  | <b>aa<sub>3</sub></b>  | <b>aa<sub>4</sub></b> | <b>aa<sub>5</sub></b> |
|---------------|-----------|-------------------------------|------------------------|------------------------|-----------------------|-----------------------|
| 1             | A-Tri-III | Phe                           | Leu                    | Val-Triazole           | Leu                   | Leu                   |
| 2             | B-Tri-III | Phe                           | Leu                    | Val-Triazole           | Leu                   | NMe-Leu               |
| 3             | A-Ox-III  | Phe                           | Leu                    | Oxazole                | Leu                   | Leu                   |
| 4             | B-Ox-III  | Phe                           | Leu                    | Oxazole                | Leu                   | NMe-Leu               |
| 5             | C-Ox-III  | Phe                           | NMe-D-Phe              | Oxazole                | Leu                   | Lys(Cbz)              |
| 6             | D-Ox-III  | (2R,3R)- $\beta$ -Benzoxy-Phe | Leu                    | Oxazole                | D-Leu                 | D-Phe                 |
| 7             | D-Ox-II   | (2R,3R)- $\beta$ -Benzoxy-Phe | Oxazole                | NMe-Val                | D-Leu                 | D-Phe                 |
| 8             | D-Ox-I    | Phenyl-Oxazole                | Leu                    | NMe-Val                | D-Leu                 | D-Phe                 |
| 9             | A-Th-III  | Phe                           | Leu                    | Thiazole               | Leu                   | Leu                   |
| 10            | B-Th-III  | Phe                           | Leu                    | Thiazole               | Leu                   | NMe-Leu               |
| 11            | C-Th-III  | Phe                           | NMe-D-Phe              | Thiazole               | Leu                   | Lys(Cbz)              |
| 12            | A-PP-II   | Phe                           | Thr( $\Psi$ Me,Me-Pro) | Val                    | Leu                   | Leu                   |
| 13            | A-PP-III  | Phe                           | Leu                    | Thr( $\Psi$ Me,Me-Pro) | Leu                   | Leu                   |

**Supplementary Material**

*Davis et al.*

**Table of cytotoxicity of additional compounds**

| <b>Compound</b> |           | <b>PGI at 25<math>\mu</math>M</b> | <b>Error</b> |
|-----------------|-----------|-----------------------------------|--------------|
| <b>B</b>        |           | 86%                               | $\pm 0.3\%$  |
| <b>C</b>        |           | 78.8%                             | $\pm 1.4\%$  |
| <b>D</b>        |           | 47.5%                             | $\pm 5.1\%$  |
| <b>2</b>        | B-Tri-III | 60.9%                             | $\pm 3.7\%$  |
| <b>4</b>        | B-Ox-III  | 23.4%                             | $\pm 6.0\%$  |
| <b>5</b>        | C-Ox-III  | 42.2%                             | $\pm 0.8\%$  |
| <b>6</b>        | D-Ox-III  | 2.3%                              | $\pm 1.3\%$  |
| <b>7</b>        | D-Ox-II   | 4.6%                              | $\pm 2.5\%$  |
| <b>8</b>        | D-Ox-I    | 2.9%                              | $\pm 1.6\%$  |
| <b>10</b>       | B-Th-III  | 14.0%                             | $\pm 5.0\%$  |
| <b>11</b>       | C-Th-III  | 6.1%                              | $\pm 1.9\%$  |
| <b>12</b>       | A-PP-II   | 7.7%                              | $\pm 3.3\%$  |

Molecular models of all compounds in stereo



Compound A



Compound B



Compound C



Compound D



Compound 1



Compound 2



Compound 3



Compound 4



Compound 5



Compound 6

Supplementary Material

Davis et al.



Compound 7



Compound 8



Compound 9



Compound 10



Compound 11



Compound 12



Compound 13



Compound 1: A-Tri-III

NMR Tripeptide MeO-Phe-Leu-Val-N<sub>3</sub> (22)



Compound 1: A-Tri-III

NMR Dipeptide Alkyne-Leu-Leu-NHBoc



## Display Report - All Windows Selected Analysis

**Analysis Name:** MD(II)134.D    **Instrument:** Agilent 6330 Ion Trap    **Print Date:** 7/15/2009 4:50:54 PM  
**Method:** SANA.M    **Operator:** sdsu    **Acq. Date:** 7/3/2009 12:29:06 PM  
**Sample Name:** md(II)134  
**Analysis Info:**



Compound 1: A-Tri-III

LCMS Pentapeptide Alkyne-Leu-Leu-Phe-Leu-Val-N<sub>3</sub> (23) (MW = 611)



## Display Report - All Windows Selected Analysis

**Analysis Name:** MD(II)140\_FINAL **Instrument:** Agilent 6330 Ion Trap **Print Date:** 7/14/2009 10:24:51 PM  
**Method:** SANA\_LCN00.M **Operator:** sdsu **Acq. Date:** 7/14/2009 10:09:44 PM  
**Sample Name:** md(II)140\_final  
**Analysis Info:**



Compound 1: A-Tri-III

LCMS Macrocyclic Phe-Leu-Val-Triazole-Leu-Leu (1) (MW = 610)

SDSU

Project Name: Defaults  
Reported by User: System

Breeze

## SAMPLE INFORMATION

|              |                  |                   |                       |
|--------------|------------------|-------------------|-----------------------|
| Sample Name: | md(l)140_final_2 | Acquired By:      | System                |
| Sample Type: | Unknown          | Sample Set Name:  |                       |
| Vial:        | 1                | Acq. Method:      | primary_sanA_ss_ACN   |
| Injection #: | 30               | Date Acquired:    | 7/14/2009 10:32:58 PM |
| Run Time:    | 16.00 Minutes    | Injection Volume: | 30.00 ul              |



Channel: 2487Channel 1 Channel Desc.: Processing Method: \*\*\*\*  
 Channel: 2487Channel 2 Channel Desc.: Processing Method: \*\*\*\*

| Peak Name | RT (min) | Area ( $\mu\text{V}\cdot\text{sec}$ ) | % Area | Height ( $\mu\text{V}$ ) | Amount | Units |
|-----------|----------|---------------------------------------|--------|--------------------------|--------|-------|
| 1 ****    | ****     | ****                                  | ****   | ****                     | ****   | ****  |
| 2 ****    | ****     | ****                                  | ****   | ****                     | ****   | ****  |



Compound 1: A-Tri-III

HPLC Macrocyclic Phe-Leu-Val-Triazole-Leu-Leu (1)



Compound 1: A-Tri-III

HRMS Macrocycle Phe-Leu-Val-Triazole-Leu-Leu (1) (MW = 610.4075)



Compound 2: B-Tri-III

NMR Dipeptide Alkyne-Leu-Leu-N(Me)Boc

Supplementary Material

Davis et al.



Compound 2: B-Tri-III

NMR Tripeptide Alkyne-Leu-Leu-N(Me)-Phe-NHBoc



Compound 2: B-Tri-III

NMR Tetrapeptide Alkyne-Leu-Leu-N(Me)-Phe-Leu-NHBoc



Compound 2: B-Tri-III

NMR Pentapeptide Alkyne-Leu-Leu-N(Me)-Phe-Leu-Val-N<sub>3</sub> (33)

## Display Report - All Windows Selected Analysis

**Analysis Name:** MD(II)224.D    **Instrument:** Agilent 6330 Ion Trap    **Print Date:** 9/2/2009 8:59:53 PM  
**Method:** SANA\_LONG.M    **Operator:** sdsu    **Acq. Date:** 9/2/2009 8:50:32 PM  
**Sample Name:** md(II)224  
**Analysis Info:**



Compound 2: B-Tri-III

LCMS Pentapeptide Alkyne-Leu-Leu-N(Me)-Phe-Leu-Val-N<sub>3</sub> (33) (MW = 624)



Compound 2: B-Tri-III

NMR Macrocyclic Phe-Leu-Val-Triazole-Leu-Leu-N(Me) (2)

## Display Report - All Windows Selected Analysis

**Analysis Name:** MD(II)226\_FINAL **Instrument:** Agilent 6330 Ion Trap **Print Date:** 9/9/2009 9:04:20 PM  
**Method:** SANA.M L.D **Operator:** sdsu **Acq. Date:** 9/9/2009 8:56:29 PM  
**Sample Name:** md(II)226\_final  
**Analysis Info:**



Compound 2: B-Tri-III

LCMS Macrocycle Phe-Leu-Val-Triazole-Leu-Leu-N(Me) (2) (MW = 624)

Supplementary Material

Davis et al.

SDSU

Project Name: Defaults  
Reported by User: System

*1/Breeze*

SAMPLE INFORMATION

|              |               |                   |                      |
|--------------|---------------|-------------------|----------------------|
| Sample Name: | md(II)226_f50 | Acquired By:      | System               |
| Sample Type: | Unknown       | Sample Set Name:  |                      |
| Vial:        | 1             | Acq. Method:      | primary_sanA_ss_ACN  |
| Injection #: | 133           | Date Acquired:    | 9/7/2009 10:43:40 PM |
| Run Time:    | 16.00 Minutes | Injection Volume: | 50.00 ul             |



Channel: 2487Channel 1 Channel Desc.: Processing Method: \*  
Channel: 2487Channel 2 Channel Desc.: Processing Method: \*

| Peak Name | RT (min) | Area (V*sec) | % Area | Height (V) | Amount | Units |
|-----------|----------|--------------|--------|------------|--------|-------|
| 1 ****    | ****     | ****         | ****   | ****       | ****   | ****  |
| 2 ****    | ****     | ****         | ****   | ****       | ****   | ****  |



Compound 2: B-Tri-III

HPLC Macrocycle Phe-Leu-Val-Triazole-Leu-Leu-N(Me) (2)

# Supplementary Material

Davis et al.



Compound 2: B-Tri-III

HRMS Macrocycle Phe-Leu-Val-Triazole-Leu-Leu-N(Me) (2) (MW = 624.4257)

Davis et al.



Compound 3: A-Ox-III

NMR Dipeptide MeO-Ser(Bzl)-Leu-NHBoc



## Display Report - All Windows Selected Analysis

Analysis Name: LAN\_LT\_OX1.D Instrument: Agilent 6330 Ion Trap Print Date: 6/8/2011 9:35:07 AM  
Method: SANA.M Operator: sdsu Acq. Date: 5/11/2010 4:11:04 AM  
Sample Name: LAN\_LT\_Ox1  
Analysis Info:



Compound 3: A-Ox-III

LCMS Linear pentapeptide MeO-Oxazole-Leu-Leu-Phe-Leu-NHBoc (43) (MW = 685.85)

Davis et al.



Compound 3: A-Ox-III

## NMR Macrocycle Phe-Leu-Oxazole-Leu-Leu (3)



Davis et al.

SDSU

Project Name: Defaults  
Reported by User: System

Breeze

SAMPLE INFORMATION

|              |               |                   |                      |
|--------------|---------------|-------------------|----------------------|
| Sample Name: | oxazole1-Ian  | Acquired By:      | System               |
| Sample Type: | Unknown       | Sample Set Name:  |                      |
| Vial:        | 1             | Acq. Method:      | primary_sanA_ss_ACN  |
| Injection #: | 299           | Date Acquired:    | 6/28/2010 5:25:18 PM |
| Run Time:    | 16.00 Minutes | Injection Volume: | 100.00 ul            |



Channel: 2487Channel 1 Channel Desc.: Processing Method: \*\*\*\*  
Channel: 2487Channel 2 Channel Desc.: Processing Method: \*\*\*\*

| Peak Name | RT (min) | Area (μV*sec) | % Area | Height (μV) | Amount | Units |
|-----------|----------|---------------|--------|-------------|--------|-------|
| 1 ****    | ****     | ****          | ****   | ****        | ****   | ****  |
| 2 ****    | ****     | ****          | ****   | ****        | ****   | ****  |



Compound 3: A-Ox-III

HPLC Macrocycle Phe-Leu-Oxazole-Leu-Leu (3)

# Supplementary Material

Davis et al.

Polarity/Scan Type: Positive

Sample Name: syek5696

Acq. File: 103111003.wiff  
Acq. Date: Monday, October 31, 20



Compound 3: A-Ox-III

HRMS Macrocycle Phe-Leu-Oxazole-Leu-Leu (3) (MW = 554.3313)







Compound 4: B-Ox-III

NMR Dipeptide MeO-Ser(Bzl)-Leu-NHBoc

Davis et al.



Compound 4: B-Ox-III

NMR Dipeptide MeO-Oxazole-Leu-NHBoc



Compound 4: B-Ox-III

NMR Pentapeptide MeO-Oxazole-Leu-Leu-N(Me)-Phe-Leu-NHBoc





## Display Report - All Windows Selected Analysis

**Analysis Name:** HW260.D      **Instrument:** Agilent 6330 Ion Trap      **Print Date:** 11/1/2010 1:38:38 PM  
**Method:** SANA.M      **Operator:** sdsu      **Acq. Date:** 10/26/2010 4:50:50 PM  
**Sample Name:** hw260  
**Analysis Info:**



Compound 4: B-Ox-III

LCMS Macrocycle Phe-Leu-Oxazole-Leu-Leu-N(Me) (4) (MW = 567)

Davis et al.

SDSU

Project Name: Defaults  
Reported by User: System

Breeze

## SAMPLE INFORMATION

|              |               |                   |                       |
|--------------|---------------|-------------------|-----------------------|
| Sample Name: | hw260         | Acquired By:      | System                |
| Sample Type: | Unknown       | Sample Set Name:  |                       |
| Vial:        | 1             | Acq. Method:      | primary_sanA_ss_ACN   |
| Injection #: | 852           | Date Acquired:    | 10/27/2010 9:47:35 AM |
| Run Time:    | 16.00 Minutes | Injection Volume: | 50.00 ul              |



— Channel: 2487Channel 1 Channel Desc.: Processing Method: \*  
 — Channel: 2487Channel 2 Channel Desc.: Processing Method: \*

| Peak Name | RT (min) | Area (V*sec) | % Area | Height (V) | Amount | Units |
|-----------|----------|--------------|--------|------------|--------|-------|
| 1         | ****     | ****         | ****   | ****       | ****   | ****  |
| 2         | ****     | ****         | ****   | ****       | ****   | ****  |



Compound 4: B-Ox-III

HPLC Macrocyclic Phe-Leu-Oxazole-Leu-Leu-N(Me) (4)

Supplementary Material

Davis et al.

Polarity/Scan Type: Positive

Sample Name: syek5697

Acq. File: 103111004.wiff  
Acq. Date: Monday, October 31, 20



Compound 4: B-Ox-III

HRMS Macrocycle Phe-Leu-Oxazole-Leu-Leu-N(Me) (4) (MW = 568.3520)

Davis et al.



Compound 5: C-Ox-III

NMR Dipeptide MeO-Lys(Cbz)-Phe-NHBoc

Supplementary Material

Davis et al.



Compound 5: C-Ox-III

NMR Tripeptide MeO-Lys(Cbz)-Phe-D-Phe-N(Me)Boc

Supplementary Material

Davis et al.



Compound 5: C-Ox-III

NMR Dipeptide MeO-Ser(Bzl)-Leu-NHBoc

Davis et al.



Compound 5: C-Ox-III

NMR Dipeptide MeO-Oxazole-Leu-NHBoc

Supplementary Material

Davis et al.



Compound 5: C-Ox-III

NMR Pentapeptide MeO-Oxazole-Leu-Lys(Cbz)-Phe-D-Phe-N(Me)Boc

==== Shimadzu LCMSsolution Analysis Report ====



Ret. Time: 6.633(Scan#: 339)

BG Mode: ?

Mass Peaks: 1619 Base Peak: 883.30(1350551) Polarity: Pos Segment: 1 - Event: 1



Compound 5: C-Ox-III

HPLC/LCMS Pentapeptide MeO-Oxazole-Leu-Lys(Cbz)-Phe-D-Phe-N(Me)Boc (MW = 882)



==== Shimadzu LCMSsolution Analysis Report ====



Ret Time: 5.200(Scan#: 253)

BG Mode: ?

Mass Peaks: 1605 Base Peak: 751.15(881037) Polarity: Pos Segment: 1 - Event: 1



Compound 5: C-Ox-III

HPLC+LCMS Macrocyclic Phe-D-Phe-N(Me)-Oxazole-Leu-Lys(Cbz) (5) (MW=750)

Davis et al.



Compound 5: C-Ox-III

HRMS Macrocycle Phe-D-Phe-N(Me)-Oxazole-Leu-Lys(Cbz) (5) (MW= 751.3821)



Compound 6: D-Ox-III

NMR Dipeptide MeO-Ser(Bzl)-D-Leu-NHBoc



Compound 6: D-Ox-III

NMR Dipeptide MeO-Oxazole-D-Leu-NHBoc

Davis et al.



Compound 6: D-Ox-III

LCMS Tripeptide HO-D-Phe-Phe-(2R,3R)/(2S,3S)-β-OH-Leu-NHBoc (MW = 541)



Compound 6: D-Ox-III

NMR Pentapeptide MeO-Oxazole-D-Leu-D-Phe-(2R,3R)/(2S,3S)-β-OH-Phe-Leu-NHBoc

## Display Report - All Windows Selected Analysis

Analysis Name: EKS-III-212.D Instrument: Agilent 6330 Ion Trap Print Date: 6/8/2011 9:30:59 AM  
Method: SANA.M Operator: sdsu Acq. Date: 10/19/2010 6:46:26 PM  
Sample Name: eks-III-212  
Analysis Info:



Compound 6: D-Ox-III

LCMS Pentapeptide MeO-Oxazole-D-Leu-D-Phe-(2R,3R)/(2S,3S)- $\beta$ -OH-Phe-Leu-NHBoc (MW = 736)





Compound 6: D-Ox-III  
 NMR Macrocyclic (2R,3R)- $\beta$ -benzyloxy-Phe-Leu-Oxazole-D-Leu-D-Phe (6)



Davis et al.

SDSU

Project Name: Defaults  
 Reported by User: System

Breeze

## SAMPLE INFORMATION

|              |                 |                   |                      |
|--------------|-----------------|-------------------|----------------------|
| Sample Name: | eks_comp145_3ox | Acquired By:      | System               |
| Sample Type: | Unknown         | Sample Set Name:  |                      |
| Vial:        | 1               | Acq. Method:      | primary_sanA_ss_ACN  |
| Injection #: | 240             | Date Acquired:    | 3/16/2011 1:22:10 PM |
| Run Time:    | 16.00 Minutes   | Injection Volume: | 50.00 ul             |



— Channel: 2487Channel 1 Channel Desc.: Processing Method: \*  
 — Channel: 2487Channel 2 Channel Desc.: Processing Method: \*

| Peak Name | RT (min) | Area (V*sec) | % Area | Height (V) | Amount | Units |
|-----------|----------|--------------|--------|------------|--------|-------|
| 1 ****    | ****     | ****         | ****   | ****       | ****   | ****  |
| 2 ****    | ****     | ****         | ****   | ****       | ****   | ****  |



Compound 6: D-Ox-III

HPLC Macrocycle (2R,3R)- $\beta$ -benzoxy-Phe-Leu-Oxazole-D-Leu-D-Phe (6)

# Supplementary Material

Davis et al.

Polarity/Scan Type: Positive

Sample Name: syek5699

Acq. File: 103111006.wil  
Acq. Date: Monday, October 31, 2011  
Max. 6.6e5 counts



Compound 6: D-Ox-III

HRMS Macrocycle (2R,3R)- $\beta$ -benzoxy-Phe-Leu-Oxazole-D-Leu-D-Phe (6) (MW = 694.3592)



Compound 7: D-Ox-II

NMR Di-peptide MeO-Ser(Bzl)-Val-N(Me)Boc



Compound 7: D-Ox-II

NMR Dipeptide MeO-Oxazole-Val-N(Me)Boc

## Display Report - All Windows Selected Analysis

**Analysis Name:** EKS-III-234.D    **Instrument:** Agilent 6330 Ion Trap    **Print Date:** 6/8/2011 9:22:13 AM  
**Method:** SANA.M    **Operator:** sdsu    **Acq. Date:** 11/8/2010 12:05:19 PM  
**Sample Name:** eks-III-234  
**Analysis Info:**



Compound 7: D-Ox-II

LCMS Tripeptide HO-D-Leu-D-Phe-  $\beta$ -OH-(2R,3R)/(2S,3S)-NHBOc (MW = 444)



Compound 7: D-Ox-II

NMR Pentapeptide MeO-Oxazole-Val-N(Me)-D-Leu-D-Phe-(2R,3R)/(2S,3S)- $\beta$ -OH-Phe-NHBoc

## Display Report - All Windows Selected Analysis

**Analysis Name:** EKS-III-244\_F38 **Instrument:** Agilent 6330 Ion Trap **Print Date:** 6/8/2011 9:27:43 AM  
**Method:** SANA.M -45.D **Operator:** sdsu **Acq. Date:** 11/19/2010 4:08:59 AM  
**Sample Name:** eks-III-244\_f38-45  
**Analysis Info:**



Compound 7: D-Ox-II

**LCMS Pentapeptide MeO-oxazole-Val-N(Me)-D-Leu-D-Phe-(2R,3R)/(2S,3S)- $\beta$ -OH-Phe-NHBoc (MW = 736)**





## Display Report - All Windows Selected Analysis

**Analysis Name:** EKS-II256\_F11-1 **Instrument:** Agilent 6330 Ion Trap **Print Date:** 12/13/2010 5:30:26 PM  
**Method:** SANA.M 2\_8MIN.D **Operator:** sdsu **Acq. Date:** 12/13/2010 4:02:20 PM  
**Sample Name:** eks-II256\_f11-12\_8min  
**Analysis Info:**



Compound 7: D-Ox-II

**LCMS Macrocycle (2R,3R)- $\beta$ -benzoxy-Phe-oxazole-Val-N(Me)-D-Leu-D-Phe (7) (MW = 694)**

Davis et al.

SDSU

Project Name: Defaults  
Reported by User: System

Breeze

## SAMPLE INFORMATION

|              |                     |                   |                      |
|--------------|---------------------|-------------------|----------------------|
| Sample Name: | eks-III-252_ERT-208 | Acquired By:      | System               |
| Sample Type: | Unknown             | Sample Set Name:  |                      |
| Vial:        | 1                   | Acq. Method:      | primary_sanA_ss_ACN  |
| Injection #: | 42                  | Date Acquired:    | 12/7/2010 4:31:57 PM |
| Run Time:    | 16.00 Minutes       | Injection Volume: | 75.00 ul             |



— Channel: 2487Channel 1 Channel Desc.: Processing Method: \*  
 — Channel: 2487Channel 2 Channel Desc.: Processing Method: \*

| Peak Name | RT (min) | Area (V*sec) | % Area | Height (V) | Amount | Units |
|-----------|----------|--------------|--------|------------|--------|-------|
| 1 ****    | ****     | ****         | ****   | ****       | ****   | ****  |
| 2 ****    | ****     | ****         | ****   | ****       | ****   | ****  |



Compound 7: D-Ox-II

HPLC Macrocycle (2R,3R)-β-benzyloxy-Phe-oxazole-Val-N(Me)-D-Leu-D-Phe (7)

# Supplementary Material

Davis et al.

Polarity/Scan Type: Positive

Sample Name: syek5700

Acq. File: 103111007.wi  
Acq. Date: Monday, October 31, 2011  
Max. 4.1e5 counts



Compound 7: D-Ox-II

HRMS Macrocycle (2R,3R)- $\beta$ -benzoxy-Phe-oxazole-Val-N(Me)-D-Leu-D-Phe (7) (MW = 694.3570)

## Display Report - All Windows Selected Analysis

**Analysis Name:** JBK\_145T1\_LP.D **Instrument:** Agilent 6330 Ion Trap **Print Date:** 6/8/2011 9:18:30 AM  
**Method:** SANA.M **Operator:** sdsu **Acq. Date:** 6/28/2010 10:35:16 AM  
**Sample Name:** jbk\_145T1\_lp  
**Analysis Info:**



## Display Report - All Windows Selected Analysis

Analysis Name: JBK\_196B.D    Instrument: Agilent 6330 Ion Trap    Print Date: 6/8/2011 9:12:14 AM  
Method: SANA.M    Operator: sdsu    Acq. Date: 11/18/2010 4:02:48 AM  
Sample Name: jbk\_196b  
Analysis Info:



Compound 8: D-Ox-I

LCMS Macrocycle  $\beta$ -OH(2R,3R)-Phe-Leu-Val-N(Me)-D-Leu-D-Phe (MW = 649.82)





Compound 8: D-Ox-I

## NMR Macrocycle Phe-Oxazole-Leu-Val-N(Me)-D-Leu-D-Phe (8)

## Display Report - All Windows Selected Analysis

Analysis Name: JBK\_145\_1\_OX. Instrument: Agilent 6330 Ion Trap Print Date: 3/20/2011 1:32:40 PM  
Method: SANA.M D Operator: sdsu Acq. Date: 3/20/2011 1:24:12 PM  
Sample Name: jbk\_145\_1\_Ox  
Analysis Info:



Compound 8: D-Ox-I

LCMS Macrocycle Phe-Oxazole-Leu-Val-N(Me)-D-Leu-D-Phe (8) (MW = 629.79)



Compound 8: D-Ox-I

HRMS Macrocycle Phe-Oxazole-Leu-Val-N(Me)-D-Leu-D-Phe (8) (MW = 630.3646)





Compound 9: A-Th-III

NMR Tripeptide MeO-Phe-Leu-Ketone-Br (48)



Compound 9: A-Th-III

NMR Diptide Thioamide-Leu-Leu-NHBoc (52)



Compound 9: A-Th-III

NMR Pentapeptide MeO-Phe-Leu-Thiazole-Leu-Leu-NHBoc (53)

Davis et al.

## Display Report - All Windows Selected Analysis

Analysis Name: HW208.D  
Method: SANA.M  
Sample Name: hw208\_aucol35  
Analysis Info:

Instrument: Agilent 6330 Ion Trap  
Operator: sdsu

Print Date: 6/8/2011 9:14:51 AM  
Acq. Date: 6/9/2010 7:21:57 PM



Compound 9: A-Th-III

LCMS Pentapeptide MeO-Phe-Leu-Thiazole-Leu-Leu-NHBoc (53) (MW=701)



Compound 9: A-Th-III

NMR Macrocycle Phe-Leu-Thiazole-Leu-Leu (9)

## Display Report - All Windows All Analyses

Operator: sdsu

Instrument: Agilent 6330 Ion Trap

Print Date: 7/13/2010 3:29:17 PM



MSD Trap Report v 4 (Let-Opt2)

Page 1 of 1

Agilent Technologies

Compound 9: A-Th-III

LCMS Macrocycle Phe-Leu-Thiazole-Leu-Leu (9) (MW=569)

SDSU

Project Name: Defaults  
Reported by User: System

Breeze

SAMPLE INFORMATION

|              |               |                   |                      |
|--------------|---------------|-------------------|----------------------|
| Sample Name: | hw214         | Acquired By:      | System               |
| Sample Type: | Unknown       | Sample Set Name:  |                      |
| Vial:        | 1             | Acq. Method:      | primary_sanA_ss_ACN  |
| Injection #: | 377           | Date Acquired:    | 6/30/2010 6:29:30 PM |
| Run Time:    | 16.00 Minutes | Injection Volume: | 40.00 ul             |



— Channel: 2487Channel 1 Channel Desc.: Processing Method: \*  
— Channel: 2487Channel 2 Channel Desc.: Processing Method: \*

| Peak Name | RT (min) | Area (V*sec) | % Area | Height (V) | Amount | Units |
|-----------|----------|--------------|--------|------------|--------|-------|
| 1         | ****     | ****         | ****   | ****       | ****   | ****  |
| 2         | ****     | ****         | ****   | ****       | ****   | ****  |



Compound 9: A-Th-III

HPLC Macrocyclic Phe-Leu-Thiazole-Leu-Leu (9)

Supplementary Material

Davis et al.

Polarity/Scan Type: Positive

Sample Name: syek5702

Acq. File: 103111009.wiff

Acq. Date: Monday, October 31, 20



Compound 9: A-Th-III

HRMS Macrocycle Phe-Leu-Thiazole-Leu-Leu (9) (MW= 570.3102)



Compound 10: B-Th-III

NMR Dipeptide MeO-Leu-N(Me)-Phe-NHBoc



Compound 10: B-Th-III

NMR Tripeptide MeO-Leu-N(Me)-Phe-Leu-NHBoc



Compound 10: B-Th-III

NMR Di-peptide EtO-Thiazole-Leu-NHBoc (57)



## Display Report - All Windows Selected Analysis

**Analysis Name:** HW236.D      **Instrument:** Agilent 6330 Ion Trap      **Print Date:** 6/8/2011 9:16:12 AM  
**Method:** SANA.M      **Operator:** sdsu      **Acq. Date:** 8/12/2010 4:29:06 PM  
**Sample Name:** hw236  
**Analysis Info:**



Compound 10: B-Th-III

LCMS Pentapeptide EtO-Thiazole-Leu-Leu-N(Me)-Phe-Leu-NHBoc (63) (MW = 729)





Davis et al.

SDSU

Project Name: Defaults  
Reported by User: System

Breeze

## SAMPLE INFORMATION

|              |               |                   |                       |
|--------------|---------------|-------------------|-----------------------|
| Sample Name: | hw242         | Acquired By:      | System                |
| Sample Type: | Unknown       | Sample Set Name:  |                       |
| Vial:        | 1             | Acq. Method:      | primary_sanA_ss       |
| Injection #: | 749           | Date Acquired:    | 9/29/2010 11:33:03 AM |
| Run Time:    | 16.00 Minutes | Injection Volume: | 100.00 ul             |



— Channel: 2487Channel 1 Channel Desc.: Processing Method: \*  
 — Channel: 2487Channel 2 Channel Desc.: Processing Method: \*

| Peak Name | RT (min) | Area (V*sec) | % Area | Height (V) | Amount | Units |
|-----------|----------|--------------|--------|------------|--------|-------|
| 1         | ****     | ****         | ****   | ****       | ****   | ****  |
| 2         | ****     | ****         | ****   | ****       | ****   | ****  |



Compound 10: B-Th-III

HPLC Macrocyclic Phe-Leu-Thiazole-Leu-Leu-N(Me) (10)

## Supplementary Material

Davis et al.

Polarity/Scan Type: Positive

Sample Name: syek5703

Acq. File: 103111010.wiff  
Acq. Date: Monday, October 31, 20



Compound 10: B-Th-III

HRMS Macrocycle Phe-Leu-Thiazole-Leu-Leu-N(Me) (10) (MW = 584.3253)

Supplementary Material

Davis et al.



Compound 11: C-Th-III

NMR Dipeptide MeO-Lys(Cbz)-Phe-NHBoc

Davis et al.



Compound 11: C-Th-III

NMR Tripeptide MeO-Lys(Cbz)-Phe-D-Phe-N(Me)Boc

Davis et al.



Compound 11: C-Th-III

NMR Dipeptide EtO-Thiazole-Leu-NHBoc

Supplementary Material

Davis et al.



Compound 11: C-Th-III

NMR Pentapeptide EtO-Thiazole-Leu-Lys(Cbz)-Phe-D-Phe-N(Me)Boc

==== Shimadzu LCMSsolution Analysis Report ====



Ret. Time: 3.600 (Scan#: 157)

BG Mode: ?

Mass Peaks: 1288 Base Peak: 913.35 (7253665) Polarity: Pos Segment1 - Event1



Compound 11: C-Th-III

HPLC+LCMS Pentapeptide EtO-Thiazole-Leu-Lys(Cbz)-Phe-D-Phe-N(Me)Boc (MW = 912)



Compound 11: C-Th-III

NMR Macrocycle Phe-D-Phe-N(Me)-Thiazole-Leu-Lys(Cbz) (11)



# Supplementary Material

Davis et al.

Polarity/Scan Type: Positive

Sample Name: syek5711

Acq. File: 103111014.wiff  
Acq. Date: Monday, October 31, 20  
Max. 3.3e5 counts.



Compound 11: C-Th-III

HRMS Macrocycle Phe-D-Phe-N(Me)-Thiazole-Leu-Lys(Cbz) (11) (MW = 767.3583)

Supplementary Material

Davis et al.

C:\Loliffe\Kelly\AG-1-15

28/05/2010 12:35:41 AM

AG-1-15



Compound 12: A-PP-II

LCMS Deprotected Pentapeptide HO-Thr( $\Psi$ Me,Me-Pro)-Val-Leu-Leu-Phe-NH<sub>2</sub> (MW = 631)

Supplementary Material

Davis et al.

<sup>1</sup>H NMR of Cyclicized Pentapeptide Thr(ψ-Me,Me-Pro)-Val-Leu-Leu-Phe (12-PP)



Compound 12: A-PP-II

NMR Macrocycle Phe-Thr(ψMe,Me-Pro)-Val-Leu-Leu (12)

# Supplementary Material

Davis et al.



Compound 12: A-PP-II

**LCMS Macrocyclic Phe-Thr(ΨMe,Me-Pro)-Val-Leu-Leu (MW = 613)**

**Empower**The University of Sydney, School of Chemistry  
Single Channel Report

## SAMPLE INFORMATION

|                    |                                                                                    |                     |                                    |
|--------------------|------------------------------------------------------------------------------------|---------------------|------------------------------------|
| Project Name:      | Payne                                                                              | Acq. Method Set:    | G_40to100ov30_B_D2ml               |
| Sample Name:       | AG-1-16M-2                                                                         | Sample Set Name:    | RJP_AFGPanalyt                     |
| Sample Type:       | Unknown                                                                            | Date Acquired:      | 9/08/2010 9:42:11 PM EST           |
| Vial:              | 8                                                                                  | Proc. Method:       | NoPeaks                            |
| Injection #:       | 1                                                                                  | Date Processed:     | 13/08/2010 1:49:27 PM EST          |
| Injection Volume:  | 10.00 ul                                                                           | Channel Name:       | PDA Max Plot 190.0 - 800.0         |
| Run Time:          | 70.0 Minutes                                                                       | Proc. Chnl. Descr.: | PDA MaxPlot (190.0 nm to 800.0 nm) |
| Chromatogram_Info: | 0t100%Bover40, A:H2O/TFA 100:0.1, B:ACN/TFA 100:0.1; SunFire C18-106 01;0.2 mL/min |                     |                                    |



|   | RT     | Area     | % Area | Height  |
|---|--------|----------|--------|---------|
| 1 | 15.979 | 20121855 | 97.31  | 1447222 |
| 2 | 16.476 | 557241   | 2.69   | 48631   |

Compound 12: A-PP-II

HPLC Macrocyclic Phe-Thr( $\Psi$ Me,Me-Pro)-Val-Leu-Leu (12)

# Supplementary Material

Davis et al.

Polarity/Scan Type: Positive

Sample Name: syek5705

Acq. File: 103111011.wiff  
Acq. Date: Monday, October 31, 20



Compound 12: A-PP-II

HRMS Macrocycle Phe-Thr( $\Psi$ Me,Me-Pro)-Val-Leu-Leu (MW = 614.3887)



Compound 13: A-PP-III

LCMS Deprotected Pentapeptide HO-Thr( $\Psi$ Me,Me-Pro)-Leu-Leu-Phe-Leu-NH<sub>2</sub> (MW=646)

Davis et al.



## Display Report - All Windows Selected Analysis

**Analysis Name:** LDA\_18-III\_1-3P **Instrument:** Agilent 6330 Ion Trap **Print Date:** 7/29/2010 12:00:31 PM  
**Method:** SANA.M P.D **Operator:** sdsu **Acq. Date:** 7/13/2010 5:53:29 PM  
**Sample Name:** LDA\_18-III\_1-3pp  
**Analysis Info:**



Compound 13: A-PP-III

LCMS Macrocycle Phe-Leu-Thr( $\Psi$ Me,Me-Pro)-Leu-Leu (13) (MW= 628)

SDSU

Project Name: Defaults  
Reported by User: System

Breeze

| SAMPLE INFORMATION |                  |                   |                      |
|--------------------|------------------|-------------------|----------------------|
| Sample Name:       | LDA_18-III_1-3PP | Acquired By:      | System               |
| Sample Type:       | Unknown          | Sample Set Name:  |                      |
| Vial:              | 1                | Acq. Method:      | primary_sanA_ss_ACN  |
| Injection #:       | 480              | Date Acquired:    | 7/20/2010 2:25:27 PM |
| Run Time:          | 16.00 Minutes    | Injection Volume: | 50.00 ul             |



Channel: 2487Channel 1 Channel Desc.: Processing Method: \*\*\*\*  
Channel: 2487Channel 2 Channel Desc.: Processing Method: \*\*\*\*

| Peak Name | RT (min) | Area (μV*sec) | % Area | Height (μV) | Amount | Units |
|-----------|----------|---------------|--------|-------------|--------|-------|
| 1         | ****     | ****          | ****   | ****        | ****   | ****  |
| 2         | ****     | ****          | ****   | ****        | ****   | ****  |



Compound 13: A-PP-III

HPLC Macrocycle Phe-Leu-Thr(ΨMe,Me-Pro)-Leu-Leu (13)

# Supplementary Material

Davis et al.

Polarity/Scan Type: Positive

Sample Name: syek5706

Acq. File: 103111012.wiff  
Acq. Date: Monday, October 31, 20



Compound 13: A-PP-III

HRMS Macrocycle Phe-Leu-Thr( $\Psi$ Me,Me-Pro)-Leu-Leu (13) (MW= 628.4040)
